# Supplementary material for: The risk of smoking on multiple sclerosis: a meta-analysis based on 20,626 cases from case-control and cohort studies
Source: PeerJ. 2016 Mar 15;4:e1797. doi: 10.7717/peerj.1797 (PMC4806598; doi:10.7717/peerj.1797)
Supplement: Supplemental Information 2 [file peerj-04-1797-s002.xls]

## Sheet: Sheet1
序号	题目	作者
1	Reduced duration of breastfeeding is associated with a higher risk of multiple sclerosis in both Italian and Norwegian adult males: the EnvIMS study.		入选	1	入选	分2
2	Risk factors for multiple sclerosis, neuromyelitis optica and transverse myelitis.		入选	1	入选
3	Environmental exposures and the risk of multiple sclerosis investigated in a Norwegian case-control study.		入选	1	入选
4	Risk factors for increased multiple sclerosis susceptibility in the Iranian population.		入选	1	入选
5	Smoking increases the risk of multiple sclerosis in Queensland, Australia.		入选	1	入选
6	Smoking and risk of multiple sclerosis: evidence of modification by NAT1 variants.		入选一半	1	入选
7	Multiple sclerosis in the Iranian immigrant population of BC, Canada: prevalence and risk factors.		数据不是比较病例和对照的吸烟率	4	无法计算
8	Alcohol as a modifiable lifestyle factor affecting multiple sclerosis risk.		排除，重复	2	排除，重复
9	Smoking and multiple sclerosis susceptibility.		入选	1	入选
10	Cigarette smoking and associated risk of multiple sclerosis in the Iranian population.		入选	1	入选
11	[Assessment of exposure to tobacco smoke in a selected group of patients withmultiple sclerosis from the Upper Silesia region].		找不到全文	3	找不到全文
12	Nicotine might have a protective effect in the etiology of multiple sclerosis.		排除，重复	2	排除，重复
13	Lack of replication of interaction between EBNA1 IgG and smoking in risk formultiple sclerosis.		排除，重复	2	排除，重复
14	Rising incidence of multiple sclerosis in females associated with urbanization.		入选	1	入选
15	Cigarette smoking and the risk of multiple sclerosis: a sibling case-control study in Isfahan, Iran.		入选	1	入选
16	A case-control study of risk factors for multiple sclerosis in Iran.		入选	1	入选
17	Smoking and two human leukocyte antigen genes interact to increase the risk formultiple sclerosis.		排除，重复	2	排除，重复
18	Combined effects of smoking, anti-EBNA antibodies, and HLA-DRB1*1501 onmultiple sclerosis risk.		入选	1	入选	分3
19	Cigarette smoking and risk of MS in multiplex families.		入选	1	入选
20	Tobacco smoking, but not Swedish snuff use, increases the risk of multiple sclerosis.		排除，重复	2	排除，重复
21	Potential risk factors for multiple sclerosis in Rio de Janeiro: a case-control study.		入选	1	入选
22	[A case-control study of the influence of the smoking behaviour in multiple sclerosis].		找不到全文	3	找不到全文
23	Lifestyle factors and multiple sclerosis: A case-control study in Belgrade.		入选	1	入选
24	Divergent risk of multiple sclerosis in two anabaptist communities in America.		没有数据	4	无法计算
25	Multiple sclerosis and lifestyle factors: the Hordaland Health Study.		无法计算	4	无法计算
26	Cigarette smoking and the progression of multiple sclerosis.		入选	1	入选
27	Smoking is a risk factor for multiple sclerosis.		入选	1	入选
28	[The epidemiology of multiples sclerosis in Alcoi. Analytical data].		找不到全文	3	找不到全文
29	[A control and case study of multiple sclerosis in the Alicante and Villajoyosa areas].		找不到全文	3	找不到全文
30	A case-control study of the association between socio-demographic, lifestyle and medical history factors and multiple sclerosis.		入选	1	入选
31	Cigarette smoking and incidence of multiple sclerosis.	排除，不是病例对照	入选	1	入选
32	Oral contraceptives and reproductive factors in multiple sclerosis incidence.	排除，不是病例对照	入选	1	入选
33	Drug abuse as a risk factor of multiple sclerosis: case-control analysis and a study of heterogeneity.	排除，没有吸烟	排除，不是吸烟	4	无法计算
34	The inﬂuence of oral contraceptives on the risk of multiple sclerosis. Br J Obstet Gynaecol		入选	1	入选
35	Smoking, use of moist snuff, and risk of chronic inflammatory diseases		入选	1	入选
36	Association of smoking with risk of multiple sclerosis: a population-based study.		入选	1	入选
37	Smoking and increased risk of multiple sclerosis: parallel trends in the sex ratio reinforce the evidence.		没有原始研究	不包括
38	Analysis of sisterchromatid exchanges (SCEs) in familial and sporadic multiple sclerosis.		排除，没对照组	4	无法计算
39	Smoking among veterans with multiple sclerosis: prevalence correlates, quit attempts, and unmet need for services		排除，没对照组	4	无法计算
40	Infection with Chlamydia pneumoniae and risk of multiple sclerosis.		排除，重复	2	排除，重复
41	Body size and risk of MS in two cohorts of US women.		排除，重复	2	排除，重复
42	Multiple sclerosis and lifestyle factors: the Hordaland Health Study		排除，重复	2	排除，重复
43	Risk factors for multiple sclerosis in Kuwait: a population-based case-control study		入选		入选
44	Hyperhomocysteinemia is associated with cognitive impairment in multiple sclerosis		入选		入选
45	Risk factors of multiple sclerosis: a case-control study		入选		入选
46	Shift Work at Young Age is Associated with Increased Risk for Multiple Sclerosis		排除重复		排除，重复
47	Smoke exposure increases the risk for multiple sclerosis		排除重复		排除，重复
48	Sunlight is associated with decreased multiple sclerosis risk:no interaction with human leukocyte antigen-DRB1*15		排除重复		排除，重复
49	Cigarette smoking, coffee consumption and multiple sclerosis risk: A case - Control study		找不到全文		找不到全文

## Sheet: Sheet2
题目	作者	发表年份	病例来源	研究对象来源地	source	NO.of MS patient	NO.of control	group	OR or RR	95% CI	调查信息来源	吸烟与疾病时间	NOS评分 总分（1，2，3）	Method of MS diagnosis	study type	Adjust for covariates	结局，原因
Reduced duration of breastfeeding is associated with a higher risk of multiple sclerosis in both Italian and Norwegian adult males:the EnvIMS study	Ragnedda G	2015	the EnvIMS Study	Norwegian	population-based	894	1610	ever-smoke	2.00 OR	(1.68,2.38)	self-administered questionnaire	之前	7(4,1,2)	McDonald criteria	multicentre case–control study	unadjusted	入选	拆分
								never-smoke
				Italian	population-based	617	1161	ever-smoke	1.55 OR	(1.28,1.88)			7(4,1,2)	McDonald criteria	multicentre case–control study	unadjusted
								never-smoke
								合并	1.79 OR	（1.58,2.04）
Risk factors for multiple sclerosis, neuromyelitis optica and transverse myelitis.	Simon K	2014	the Accelerated Cure Project for Multiple Sclerosis (ACP) Repository	USA	not	1190	454	ever-smoke	1.4 OR	(1.1,1.9)	not face interview	之前	7(3,1,3)	N/A	multicentre case–control study	Adjusted for age at interview/blood draw, study site, race/ethnicity and gender (as appropriate).	入选
								never-smoke
Environmental exposures and the risk of multiple sclerosis investigated in a Norwegian case-control study.	Gustavsen MW	2014	the Oslo MS Registry and biobank	Norwegian	not	530	918	ever-smoke	2.29 OR	(1.82,2.89)	self-administered questionnaire	current	7(3,1,3)	Poser and/or McDonald criteria	case–control study	unadjusted	入选
								never-smoke
Risk factors for increased multiple sclerosis susceptibility in the Iranian population.	Mansouri B	2014	patients from 27 cities across Iran	Iran	not	1217	787	smoker(current and ex)	1.93 OR	（1.31，2.73）	not face interview	之前	8(3,2,3)	Poser and/or McDonald criteria	multicentre case–control study	adjustment for age, sex, ethnicity, city of residence, and educational level.	入选
								non-smokers
Smoking increases the risk of multiple sclerosis in Queensland, Australia.	O'Gorman C	2014	patients in a hospital and the members of a MS Society	Australia	population-based	560	480	current smoker	3.6 OR	(2.3,5.6)	self-administered questionnaire	current	7(4,1,2)	McDonald criteria/physician	case–control study	Adjusted for age, ethnicity and sex.	入选
						male2.3(1.3,4.1)		ex-smoker	1.6 OR	(1.2,2.1)
						female1.8(1.4,2.5)		ever smoker	1.9 OR	(1.5,2.5)
								never smoke
Smoking and risk of multiple sclerosis: evidence of modification by NAT1 variants. (Kaiser study)	Briggs FB	2014	non-Hispanic whites with MS in northern California Region among members of Kaiser Permanente Medical Care Plan	USA	population-based	1012	576	ever-smoke	1.27 OR	(1.03,1.58)	not telephone questionaire	之前	7(3,1,3)	McDonald criteria	case–control study	adjusted for year of birth, sex, college education, and population ancestry.	入选
								never-smoke
(Swedish study)			non-Hispanic whites from the Epidemiological Investigation of Multiple Sclerosis in Sweden	Sweden	population-based	494	494	ever-smoke	1.45 OR	(1.12,1.88)	questionnaire	current	6(3,1,2)	McDonald criteria	nationwide case control	adjusted for year of birth, sex, college education, and ethnic origin.
								never-smoke
Alcohol as a modifiable lifestyle factor affecting multiple sclerosis risk. （EIMS）	Hedström AK	2014	Epidemiological Investigation of Multiple Sclerosis in Sweden	Sweden	population-based	745	1761	ever-smoke	1.38 OR	(1.16,1.65)	questionnaire	current	6(3,1,2)	McDonald criteria	case–control study	unadjusted	排除 ，重复
								never-smoke
(GEMS)		2014	Genes and Environment in Multiple Sclerosis from the Swedish national MS registry	Sweden	population-based	5874	5246	ever-smoke	1.42 OR	(1.32,1.53)	questionnaire	之前	7(4,1,2)	McDonald criteria	case–control study	unadjusted
								never-smoke
Smoking and multiple sclerosis susceptibility (EIMS+GEMS)	Hedström AK	2013	Epidemiological Investigation of Multiple Sclerosis in Sweden+ GEMS	Sweden	population-based	6480	7538	current smoker	1.6 OR	(1.5,1.7)	self-administered questionnaire	之前	6(3,1,2)	McDonald criteria	case–control study	adjusted for age,gender,residential,area,ancestry,and study.	排除，重复
						3916	5411	quit within 5years prior to index	1.3 OR	(1.1,1.5)
						3901	5421	quit within 5-10years prior to index	1.2 OR	(1.1,1.4)
						4113	5786	quit within >10years prior to index	1.0 OR	(0.9,1.2)
								never smoke
Cigarette smoking and associated risk of multiple sclerosis in the Iranian population	Asadollahi S	2013	the Iranian Multiple Sclerosis Registry	Iran	not	662	394	ever-smoke	1.78 OR	(1.22,2.59)	not medical date or face to face or telephone interview	之前	7(4,1,2)	Poser and McDonald criteria	case–control study	adjusted for age, educational level, ethnicity, residence, sunlight exposure, history of infections, immunization, and family history of MS.	入选
								never-smoke
						523	241	female ever smoke	1.53 OR	(0.92,2.52)						adjusted for age, educational level, ethnicity, residence, sunlight exposure, history of infections, immunization, and family history of MS.
								female never smoke
						139	152	male ever smoke	2.12 OR	(1.03,4.35)						adjusted for age, educational level, ethnicity, residence, sunlight exposure, history of infections, immunization, and family history of MS.
								male never smoke
Nicotine might have a protective effect in the etiology of multiple sclerosis	Hedström AK	2013	(EIMS+GEMS)	Sweden	population-based	6990	8279	ever-smoke	1.49 OR	(1.40,1.59)			6(3,1,2)	McDonald criteria	case–control study	adjusted for matching variables, study, educational level, and ancestry	入选
						5599	6840	current smoker	1.56 OR	(1.45,1.67)
						4677	6118	past smoker	1.35 OR	(1.24,1.47)
								never-smoke
Lack of replication of interaction between EBNA1 IgG and smoking in risk for multiple sclerosis.	Sundqvist E	2012	EIMS														排除 ，重复
Rising incidence of multiple sclerosis in females associated with urbanization.	Kotzamani D	2012	the MS Epidemiology Program Project of Crete	Greek Crete	population-based	504	591	smoker(current and ex)	1.9 OR	(1.50,2.41)	self-administered questionnaire	之前	6(3,1,2)	N/A	case–control study	unadjusted	入选
								non-smokers
						194	224	male ever smoke	2.10 OR	(1.42,3.11)						unadjusted
								male never smoke
						257	367	female ever smoke	1.77 OR	(1.26,2.50)						unadjusted
								female never smoke
Cigarette smoking and the risk of multiple sclerosis: a sibling case-control study in Isfahan, Iran	Maghzi AH	2011	Patients at the Isfahan Multiple Sclerosis Society (IMSS)	Iran Isfaha	not	516	1090	ever smoker	2.67 OR	(1.70,4.21)	self-administered questionnaire	之前	7(4,1,2)	McDonald criteria	case–control study	adjusted according to sex and current age	入选
								never smoke
						110	583	male ever smoke	2.38 OR	(1.47,3.85)						adjust for age
								male never smoke
A case-control study of risk factors for multiple sclerosis in Iran	Alonso A	2011	recruited from multiple MS clinics in different cities	Iran Isfaha，Tehran,Mashhad,Bandar,Shiraz	not	394	394	ever smoker	1.72 OR	(0.90,3.30)	not questionnaire by telephone	之前	8(4,2,2)	McDonald criteria	case–control study	Adjusted for age, gender and all the variables in the table.	入选
								never smoke
Smoking and two human leukocyte antigen genes interact to increase the risk for multiple sclerosis.	Hedström AK	2011	(EIMS)														排除 ，重复
Combined effects of smoking, anti-EBNA antibodies, and HLA-DRB1*1501 on multiple sclerosis risk	Simon KC	2010	Nurses' Health Studies.	US and Canada (women)	population-based	210	420	female ever smoker	1.4 OR	(1.0,2.0)	self-administered questionnaire	之前	7(4,1,2)	Poser not clear	nest case control study	unadjusted	入选	拆分
								female never smoke
			Tasmanian MS Study	Australia Tasmanian	population-based	136	272	ever smoker	1.5 OR	(1.0,2.4)	interview	之前	7(4,1,2)	Poser	hospital	unadjusted
								never smoke
			Swedish MS Study	the Northern Sweden Health and Disease Study Cohort (NSHDS)	population-based	96	173	ever smoker	1.4 OR	(0.8,2.4)	questionnaire	之前和之后结果一样	6(3,1,2)	N/A	nest case control study	unadjusted
								never smoke
					合并	442	865	ever smoker	1.5 OR	(1.1,1.9)			6(3,1,2)			unadjusted
								never smoke
Cigarette smoking and risk of MS in multiplex families	Jafari N	2009	Eras MS clinic or other neurological clinics in the Netherlands	Netherland	not	136	204	ever smoker	1.09 OR	(0.68,1.73)	self-administered questionnaire	之前	8(4,1,3)	McDonald criteria	case–control study	adjusted for current age and sex	入选
								current smoker	1.03 OR	(0.61,1.73)
								past smoker	1.19 OR	(0.65,2.20)
								never smoke
Tobacco smoking, but not Swedish snuff use, increases the risk of multiple sclerosis	Hedström AK	2009	EIMS	Sweden	population-based	902	1855	ever smoker	1.5 OR	(1.3,1.8)	questionnaire tele 补充	之前	8(4,1,3)	McDonald criteria	case–control study	Adjusted for age, gender，ancestry, residential area	排除 ，重复	加入性别亚组
								never smoke
						258	513	male ever smoke	1.8 OR	(1.3,2.5)						Adjusted for age, gender，ancestry, residential area
								male never smoke
						649	1342	female ever smoke	1.4 OR	(1.2,1.7)						Adjusted for age, gender，ancestry, residential area
								female never smoke
Potential risk factors for multiple sclerosis in Rio de Janeiro: a case-control study	Silva KR	2009	the Neurolo-gy Department of the Hospital da Lagoa	Brazil	not	81	81	current smoker	2.0 OR	(0.9,4.3)	not interview face to face	current	6(3,1,2)	Poser	case–control study	unadjusted	入选	只有current vs never
								quit or never
Lifestyle factors and multiple sclerosis: A case-control study in Belgrade	Pekmezovic T	2006	the Institute of Neurology, Clinical Center of Serbia in Belgrade	Belgrade Serbia	not	196	210	smoking	1.6 OR	(1.08,2.37)	not interview face to face	之前	6(3,1,2)	Poser	case–control study	unadjusted	入选
								no smoking
Cigarette smoking and the progression of multiple sclerosis	Hernán MA	2005	The General Practice Research Database (GPRD)	British	not	201	1913	ever smoker	1.3 OR	(1.0,1.7)	self-administered questionnaire	之前	8(4,1,3)	Poser 进行分级	nest case–control study	unadjusted	入选
								current smoker	1.4 OR	(1.0,1.9)
								past smoker	1.0 OR	(0.6,1.8)
								never smoke
Smoking is a risk factor for multiple sclerosis	Riise T	2003	Hordaland County	Norwegian	population-based	87	22312	ever smoker	1.81 RR	(1.13,2.92)	self-administered questionnaire	之前		self report	cross-section study cohort	unadjusted	入选
								never smoke
								male ever smoke	2.75 RR
								male never smoke
								female ever smoke	1.61 RR
								female never smoke
Cigarette smoking and incidence of multiple sclerosis	Hernán MA	2001	NHS 1 and 2	America	hospital	96	238371	female current smoker	1.6 RR	(1.2,2.1)	self-administered questionnaire	之前	6(3,1,2)	physician	cohort study	Adjusted for age ,latitude tier and ancestry.	入选	只有女性
						79		female past smoker	1.2 RR	(0.9,1.6)
						139		female never smoke
A case-control study of the association between socio-demographic, lifestyle and medical history factors and multiple sclerosis	Ghadirian P	2001	Montre	Canada	population-based	200	202	ever smoker	1.6 OR	(1.0,2.4)	not interview face to face	之前	8(4,2,2)	N/A	case–control study	adjusted for age, sex, smoking and education	入选
								never smoke
Oral contraceptives and reproductive factors in multiple sclerosis incidence	Villard-Mackintosh L	1993	The Oxford.FPA study	British	hospital	63	17032	female ever smoker	1.5 RR	(0.6,3.3)	not record	之前	5(2,1,2)	N/A	cohort study	adjust for age, parity	入选	只有女性
								female never smoke
The influence of oral contraceptives on the risk of multiple sclerosis	Thorogood M	1998		England	population-based	114	46000	female 15+\day	1.4 RR	(0.9,2.2)	not record	之前	5(2,1,2)	physician	cohort study	adjusted for age,parity,social class.	入选	只有女性
								1-14\day	1.2 RR	(0.8,1.8)
								0 \day
Smoking, use of moist snuff, and risk of chronic inflammatory diseases	Carlens C	2010	the Construction Industry’s Organization for Working Environment Safety and Health	Sweden	population-based	214	277777	ever smoker	2.5 RR	(1.7,3.6)	not record	之前	5(2,1,2)	N/A	cohort study	adjust for age	入选	只有男性
								current smoker	2.8 RR	(1.9,4.2)
								past smoker	1.6 RR	(0.9,2.8)
								never smoke
Association of smoking with risk of multiple sclerosis: a population-based study	Ramagopalan SV	2013	Canadian Collaborative Pro-ject on Genetic Susceptibility to Multiple Sclerosis(CCPGSMS)	Canadian	population-based	3157	756	ever smoker	1.32 OR	(1.10,1.60)	self-administered questionnaire	current	7(4,1,2)	N/A	case–control study	adjusting for age and sex	入选
								never smoke
Smoking and increased risk of multiple sclerosis: parallel trends in the sex ratio reinforce the evidence	Palacios N	2011			population-based			ever smoker	1.5 RR	(1.17,2.01)	not record	之前		N/A	birth cohort	N/A	排除，重复	使用他人数据做性别比
								never smoke
Risk factors for multiple sclerosis in Kuwait: a population-based case-control study	Al-Afasy HH	2012	the north-western corner of the Arabian	Kuwait		101	202	ever smoker	1.7OR	(0.9,3.4)	face to face interview	之前		by a neurologist	case–control study	N/A	入选
								never smoke
Hyperhomocysteinemia is associated with cognitive impairment in multiple sclerosis	Russo C	2008		Italy		94	53	smoker	1.83OR	(0.86,3.87)	not record	not record		McDonald criteria	case–control study	N/A
								non-smokers
Risk factors of multiple sclerosis: a case-control study	Zorzon M	2003	the Multiple Sclerosis Center of the University of Trieste	Italy		140	131	smoker	1.5OR	(0.9,2.4)	face to face interview	之前		McDonald criteria	case–control study	N/A
								current smoker	1.9OR	(1.1,3.2)
								non-smokers
Smoke exposure increases the risk for multiple sclerosis	Sundstrom P	2008		Sweden		91	177	ever smoker	1.32OR	(0.79,2.20)	questionaire	之前		poser	case–control study	N/A	重复
								current smoker	1.36OR	0.78,2.37
								past smoker	1.22OR	0.58,2.56
							female	ever smoker	1.01OR	0.51,2.00
							male	ever smoker	1.91OR	0.85,4.28

## Sheet: Sheet3
序号	题目	作者 年份	结局	总	case control	cohort	male	female	data before onset	before or current	population based	hospital based	ever	current	past	adjusted	not adjusted	self-administered	not	case ascertained by admitted criteria	not
1	Reduced duration of breastfeeding is associated with a higher risk of multiple sclerosis in both Italian and Norwegian adult males: the EnvIMS study.	Ragnedda 2015	入选	1.79（1.58,2.04）	1.79（1.58,2.04）				1.79（1.58,2.04）		1.79（1.58,2.04）		1.79（1.58,2.04）				1.79（1.58,2.04）	1.79（1.58,2.04）		1.79（1.58,2.04）
8	Risk factors for multiple sclerosis, neuromyelitis optica and transverse myelitis.	Simon 2014	入选	1.4（1.1,1.9）	1.4（1.1,1.9）				1.4（1.1,1.9）			1.4（1.1,1.9）	1.4（1.1,1.9）			1.4（1.1,1.9）			1.4（1.1,1.9）		1.4（1.1,1.9）
10	Environmental exposures and the risk of multiple sclerosis investigated in a Norwegian case-control study.	Gustavsen 2014	入选	2.29（1.82,2.89）	2.29（1.82,2.89）					2.29（1.82,2.89）	2.29（1.82,2.89）		2.29（1.82,2.89）				2.29（1.82,2.89）	2.29（1.82,2.89）		2.29（1.82,2.89）
13	Risk factors for increased multiple sclerosis susceptibility in the Iranian population.	Mansouri 2014	入选	1.93（1.31,2.73）	1.93（1.31,2.73）				1.93（1.31,2.73）			1.93（1.31,2.73）	1.93（1.31,2.73）			1.93（1.31,2.73）			1.93（1.31,2.73）	1.93（1.31,2.73）
19	Smoking increases the risk of multiple sclerosis in Queensland, Australia.	O'Gorman 2014	入选	1.9（1.5,2.5）	1.9（1.5,2.5）					1.9（1.5,2.5）		1.9（1.5,2.5）	1.9（1.5,2.5）	3.6（2.6,5.3）	1.6（1.2,2.1）	1.9（1.5,2.5）		1.9（1.5,2.5）		1.9（1.5,2.5）
23	Smoking and risk of multiple sclerosis: evidence of modification by NAT1 variants.	Briggs 2014	入选一半	1.27（1.03,1.58）	1.27（1.03,1.58）				1.27（1.03,1.58）		1.27（1.03,1.58）		1.27（1.03,1.58）			1.27（1.03,1.58）			1.27（1.03,1.58）	1.27（1.03,1.58）
36	Smoking and multiple sclerosis susceptibility.	Hedström 2013	入选	1.6（1.5,1.7）	1.6（1.5,1.7）				1.6（1.5,1.7）		1.6（1.5,1.7）			1.6（1.5,1.7）		1.6（1.5,1.7）		1.6（1.5,1.7）		1.6（1.5,1.7）
41	Cigarette smoking and associated risk of multiple sclerosis in the Iranian population.	Asadollahi 2013	入选	1.78（1.22,2.59）	1.78（1.22,2.59）		2.12(1.03,4.35)	1.53(0.92,2.52)	1.78（1.22,2.59）		1.78（1.22,2.59）		1.78（1.22,2.59）			1.78（1.22,2.59）			1.78（1.22,2.59）	1.78（1.22,2.59）
78	Rising incidence of multiple sclerosis in females associated with urbanization.	Kotzamani 2012	入选	1.9（1.5,2.41）	1.9（1.5,2.41）		2.10(1.42,3.11)	1.77(1.26,2.50)	1.9（1.5,2.41）		1.9（1.5,2.41）		1.9（1.5,2.41）				1.9（1.5,2.41）	1.9（1.5,2.41）			1.9（1.5,2.41）
89	Cigarette smoking and the risk of multiple sclerosis: a sibling case-control study in Isfahan, Iran.	Maghzi 2011	入选	2.67（1.70,4.21）	2.67（1.70,4.21）		2.38(1.47,3.85)		2.67（1.70,4.21）		2.67（1.70,4.21）		2.67（1.70,4.21）			2.67（1.70,4.21）		2.67（1.70,4.21）		2.67（1.70,4.21）
111	A case-control study of risk factors for multiple sclerosis in Iran.	Alonso 2011	入选	1.72（0.90,3.30）	1.72（0.90,3.30）				1.72（0.90,3.30）			1.72（0.90,3.30）	1.72（0.90,3.30）			1.72（0.90,3.30）			1.72（0.90,3.30）	1.72（0.90,3.30）
127	Combined effects of smoking, anti-EBNA antibodies, and HLA-DRB1*1501 onmultiple sclerosis risk.	Simon 2010	入选	1.5（1.1,1.9）	1.5（1.1,1.9）				1.5（1.1,1.9）			1.5（1.1,1.9）	1.5（1.1,1.9）				1.5（1.1,1.9）	1.5（1.1,1.9）			1.5（1.1,1.9）
138	Cigarette smoking and risk of MS in multiplex families.	Jafari 2009	入选	1.09（0.68,1.73）	1.09（0.68,1.73）				1.09（0.68,1.73）			1.09（0.68,1.73）	1.09（0.68,1.73）	1.03（0.61,1.73）	1.19（0.64,2.20）	1.09（0.68,1.73）		1.09（0.68,1.73）		1.09（0.68,1.73）
149	Potential risk factors for multiple sclerosis in Rio de Janeiro: a case-control study.	Silva 2009	入选	2.0（0.9,4.3）	2.0（0.9,4.3）					2.0（0.9,4.3）		2.0（0.9,4.3）	2.0（0.9,4.3）				2.0（0.9,4.3）		2.0（0.9,4.3）	2.0（0.9,4.3）
186	Lifestyle factors and multiple sclerosis: A case-control study in Belgrade.	Pekmezovic 2006	入选	1.6（1.08,2.37）	1.6（1.08,2.37）				1.6（1.08,2.37）			1.6（1.08,2.37）	1.6（1.08,2.37）				1.6（1.08,2.37）		1.6（1.08,2.37）	1.6（1.08,2.37）
199	Cigarette smoking and the progression of multiple sclerosis.	Hernán 2005	入选	1.3（1.0，1.7）	1.3（1.0，1.7）				1.3（1.0，1.7）			1.3（1.0，1.7）	1.3（1.0，1.7）	1.4（1.0.1.9）	1.0（0.6,1.8）		1.3（1.0，1.7）	1.3（1.0，1.7）			1.3（1.0，1.7）
207	Smoking is a risk factor for multiple sclerosis.	Riise 2003	入选	1.81（1.13,2.92）		1.81（1.13,2.92）			1.81（1.13,2.92）		1.81（1.13,2.92）		1.81（1.13,2.92）				1.81（1.13,2.92）	1.81（1.13,2.92）			1.81（1.13,2.92）
214	A case-control study of the association between socio-demographic, lifestyle and medical history factors and multiple sclerosis.	Ghadirian 2001	入选	1.6（1.0,2.4）	1.6（1.0,2.4）				1.6（1.0,2.4）		1.6（1.0,2.4）		1.6（1.0,2.4）			1.6（1.0,2.4）			1.6（1.0,2.4）		1.6（1.0,2.4）
219	Cigarette smoking and incidence of multiple sclerosis.	Hernán 2001	入选	1.6（1.2,2.1）		1.6（1.2,2.1）		1.6（1.2,2.1）	1.6（1.2,2.1）			1.6（1.2,2.1）		1.6（1.2,2.1）	1.2（0.9,1.6）	1.6（1.2,2.1）		1.6（1.2,2.1）			1.6（1.2,2.1）
240	Oral contraceptives and reproductive factors in multiple sclerosis incidence.	Villard 1993	入选	1.5(0.6,3.3)		1.5(0.6,3.3)		1.5(0.6,3.3)	1.5(0.6,3.3)			1.5(0.6,3.3)	1.5(0.6,3.3)			1.5(0.6,3.3)			1.5(0.6,3.3)		1.5(0.6,3.3)
245	The inﬂuence of oral contraceptives on the risk of multiple sclerosis. Br J Obstet Gynaecol	Thorogood 1998	入选	1.2(0.8,1.8)		1.2(0.8,1.8)		1.2(0.8,1.8)	1.2(0.8,1.8)		1.2(0.8,1.8)		1.2(0.8,1.8)			1.2(0.8,1.8)			1.2(0.8,1.8)		1.2(0.8,1.8)
264	Smoking, use of moist snuff, and risk of chronic inflammatory diseases	Carlens 2010	入选	2.5(1.7,3.6)		2.5(1.7,3.6)			2.5(1.7,3.6)		2.5(1.7,3.6)		2.5(1.7,3.6)	2.8（1.9,4.2）	1.6（0.9,2.8）	2.5(1.7,3.6)			2.5(1.7,3.6)		2.5(1.7,3.6)
288	Association of smoking with risk of multiple sclerosis: a population-based study.	Ramagopalan 2013	入选	1.32(1.10,1.60)	1.32(1.10,1.60)					1.32(1.10,1.60)	1.32(1.10,1.60)					1.32(1.10,1.60)		1.32(1.10,1.60)			1.32(1.10,1.60)
